# Supplementary material
Source: publisher figshare collection journal article supplement (https://tandf.figshare.com/articles/dataset/_/12143397)
Supplement: Supplementary file 1 [file 1]

**Table S1.** Between-Group Comparisons of Aqueous Humor Levels of Na<sup>+</sup>, K<sup>+</sup>, Cl<sup>-</sup>, NO, TAS, TOS, and OSI after exclusion of patients with anti-glaucomatous usage

|                                                 | SiO            | RD             | Control       | <i>p</i>     |
|-------------------------------------------------|----------------|----------------|---------------|--------------|
| Na <sup>+</sup> (mmol/kg)                       | 146.02 ± 12.57 | 149.04 ± 12.05 | 137.56 ± 6.57 | <b>0.019</b> |
| K <sup>+</sup> (mmol/kg)                        | 4.29 ± 0.8     | 4.19 ± 0.22    | 4.01 ± 0.31   | 0.284        |
| Cl <sup>-</sup> (mmol/kg)                       | 112 ± 10.44    | 115.21 ± 7.79  | 106.23 ± 8.99 | <b>0.029</b> |
| NO (μM)                                         | 33.73 ± 14.06  | 51.07 ± 19.56  | 44.05 ± 16.38 | <b>0.012</b> |
| TAS (μmol Trolox Eqv./L)                        | 1.84 ± 0.55    | 2.40 ± 0.65    | 2.49 ± 0.56   | <b>0.02</b>  |
| TOS (μmol H <sub>2</sub> O <sub>2</sub> Eqv./L) | 33.33 ± 23.79  | 40.39 ± 24.94  | 61.46 ± 22.69 | <b>0.004</b> |
| OSI                                             | 1.85 ± 1.29    | 1.62 ± 0.81    | 2.49 ± 0.91   | 0.053        |

SiO: Silicone oil; RD: Retinal detachment; NO: Nitric oxide; TAS: Total antioxidants status, TOS: Total oxidant status, OSI: Oxidative stress index
